# Supplementary material for: Update: Entwicklungen der Gesundheitsversorgung
Source: Springer Nature journal article supplement (doi:10.1007/s41906-022-1934-0), 2022-09-01
Supplement: MOESM1 [file 23496308]

## Literatur

### zum Beitrag „Update: Entwicklungen der Gesundheitsversorgung“ von Erika Sirsch und Inge Eberl

*PflegeZeitschrift* (75) 10/2022, S. 10-13

- Aerzteblatt.de (21.07.2022) Mehr Befugnisse für Pflegefachkräfte in der häuslichen Krankenpflege. <https://www.aerzteblatt.de/nachrichten/136123/Mehr-Befugnisse-fuer-Pflegefachkraefte-in-der-haeuslichen-Krankenpflege> (Letzter Zugriff am 14.08.2022)
- Aerzteblatt.de (Nachrichten/Politik vom 13.05. 2022) Krankenhauslandschaft: Regierung will kalten Strukturwandel beenden. <https://www.aerzteblatt.de/nachrichten/134057/Krankenhauslandschaft-Regierung-will-kalten-Strukturwandel-beenden> (Letzter Zugriff am 14.08.2022)
- Aerzteblatt.de (24.02.2022) Personalmangel in der Pflege spitzt sich zu, regionale Unterschiede. <https://www.aerzteblatt.de/nachrichten/132083/Personalmangel-in-der-Pflege-spitzt-sich-zu-regionale-Unterschiede> (Letzter Zugriff am 14.08.2022)
- ÄrzteZeitung (24.09.2020) Freie Arztstühle – Fast 3300 Hausarztstellen sind unbesetzt. ÄrzteZeitung
- AG „Medizin und Ökonomie“ der Arbeitsgemeinschaft der wissenschaftlichen Medizinischen Fachgesellschaften (AWMF) (2022) Stellungnahme zur Krankenhausreform. [https://www.awmf.org/fileadmin/user\\_upload/Stellungnahmen/Medizinische\\_Versorgung/20220629\\_AWMF\\_Stellungnahme\\_KH\\_Reform\\_final.pdf](https://www.awmf.org/fileadmin/user_upload/Stellungnahmen/Medizinische_Versorgung/20220629_AWMF_Stellungnahme_KH_Reform_final.pdf) (Letzter Zugriff am 14.08.2022)
- Brause M, Kleina T, Horn A, Schaeffer D (2015) Burnout-Risiko in der stationären Langzeitversorgung. Prävention und Gesundheitsförderung, 10(1), 41-48. doi:10.1007/s11553-014-0469-7
- Bundesministerium für Gesundheit (2022a) Beschäftigte in der Pflege. <https://www.bundesgesundheitsministerium.de/themen/pflege/pflegekraefte/beschaeftigte.html> (Letzter Zugriff am 31.08.2022)
- Bundesministerium für Gesundheit (2022b) BM Lauterbach stellt Krankenhaus-Kommission vor. <https://www.bundesgesundheitsministerium.de/presse/pressemitteilungen/bm-lauterbach-stellt-krankenhaus-kommission-vor.html> (Letzter Zugriff am 14.08.2022)
- Bundesministerium für Gesundheit (2021) Pflegepersonaluntergrenzen. <https://www.bundesgesundheitsministerium.de/themen/pflege/pflegepersonaluntergrenzen.html#:~:text=Seit%201.%20Februar%202021%3A%20Tagschicht,Nachtschicht%203%20Patienten%20pro%20Pflegekraft>
- Deutsche Krankenhausgesellschaft (DKG), Deutscher Pflegerat (DPR), Verdi (23.06.2022) Eckpunkte Gesetzesauftrag Umsetzung PPR 2.0. [https://www.dkg-ev.de/fileadmin/default/Mediapool/2\\_Themen/2.5\\_Personal\\_und>Weiterbildung/2.5.0\\_PPR\\_2.0/20220623\\_Eckpunkte\\_Gesetzesauftrag\\_Umsetzung\\_PPR\\_2.0.pdf](https://www.dkg-ev.de/fileadmin/default/Mediapool/2_Themen/2.5_Personal_und>Weiterbildung/2.5.0_PPR_2.0/20220623_Eckpunkte_Gesetzesauftrag_Umsetzung_PPR_2.0.pdf) (Letzter Zugriff am 14.08.2022)

- Deutscher Bundestag (2017) Gesetz zur Reform der Pflegeberufe (Pflegeberufereformgesetz–PflBRefG).  
[https://www.bgbl.de/xaver/bgbl/start.xav?startbk=Bundesanzeiger\\_BGBL&iumpTo=bgbl117s2581.pdf#\\_bgbl\\_%2F%2F\\*%5B%40attr\\_id%3D%27bgbl117s2581.pdf%27%5D\\_1614269350443](https://www.bgbl.de/xaver/bgbl/start.xav?startbk=Bundesanzeiger_BGBL&iumpTo=bgbl117s2581.pdf#_bgbl_%2F%2F*%5B%40attr_id%3D%27bgbl117s2581.pdf%27%5D_1614269350443) (Letzter Zugriff am 14.08.2022)
- Deutsches Netzwerk für Qualitätsentwicklung in der Pflege (DNQP) (2019) Expertenstandard Entlassungsmanagement in der Pflege. <http://www.dnqp.de>
- Gemeinsamer Bundesausschluss (G-BA) (2022a). Richtlinie des Gemeinsamen Bundesausschusses über die Ausstattung der stationären Einrichtungen der Psychiatrie und Psychosomatik mit dem für die Behandlung erforderlichen therapeutischen Personal gemäß § 136a Absatz 2 Satz 1 des Fünften Buches Sozialgesetzbuch (SGB V) (Personalausstattung Psychiatrie und Psychosomatik/Richtlinie/PPP-RL). <https://www.g-ba.de/themen/qualitaetssicherung/vorgaben-zur-qualitaetssicherung/vorgaben-personalausstattung-psychiatrie-psychosomatik/> (Letzter Zugriff am 14.08.2022)
- Gemeinsamer Bundesausschuss (G-BA) (2022b). Richtlinie des Gemeinsamen Bundesausschusses über Maßnahmen zur Qualitätssicherung der Versorgung von Früh- und Reifgeborenen gemäß § 136 Absatz 1 Nummer 2 SGB V in Verbindung mit § 92 Absatz 1 Satz 2 Nummer 13 SGB V (Qualitätssicherungs-Richtlinie Früh- und Reifgeborene/QFRRL. [Richtlinie \(g-ba.de\)](https://www.g-ba.de) (Letzter Zugriff am 14.08.2022)
- Gemeinsamer Bundesausschluss (G-BA) (21.07.2022) Beschluss Häusliche Krankenpflege-Richtlinie: Regelungen über die Bestimmung der Häufigkeit und Dauer von einzelnen verordnungsfähigen Maßnahmen durch Pflegefachkräfte nach § 37 Absatz 8 SGB V und weitere Änderungen. <https://www.g-ba.de/beschluesse/5557/>
- Gesundheitswesen, S. z. B. d. E. i. (2012) Wettbewerb an der Schnittstelle zwischen ambulanter und stationärer Gesundheitsversorgung. [https://www.svr-gesundheit.de/fileadmin/Gutachten/Sondergutachten\\_2012/Kurzfassung\\_2012.pdf](https://www.svr-gesundheit.de/fileadmin/Gutachten/Sondergutachten_2012/Kurzfassung_2012.pdf) (Letzter Zugriff am 14.08.2022)
- Mihm A (2018) Pflegedienste verschicken Kündigungen. Frankfurter Allgemeine Zeitung <https://www.faz.net/aktuell/wirtschaft/pflege-keine-neuen-patienten-wegen-personal-engpass-15490434.html> (Letzter Zugriff am 14.08.2022)
- Nolting H-D, Ochmann R, Zich K, IGES Institut GmbH, (2021). Gesundheitszentren für Deutschland. Robert Bosch Stiftung GmbH, Stuttgart
- Robert Bosch Stiftung & Hertie School. (2021). Finanzierung und Vergütung eines nachhaltigen Gesundheitssystems – Ansätze und Möglichkeiten. Diskussionspapier – Think Lab 5. Stuttgart. [https://www.neustart-fuer-gesundheit.de/sites/default/files/documents/2021-05/2020-09\\_Diskussionspapier\\_Think%20Lab%205.pdf](https://www.neustart-fuer-gesundheit.de/sites/default/files/documents/2021-05/2020-09_Diskussionspapier_Think%20Lab%205.pdf) (Letzter Zugriff am 14.08.2022)
- Statistisches Bundesamt (destatis) (23.03.2022) Krankenhäuser: Einrichtungen, Betten und Patientenbewegung. <https://www.destatis.de/DE/Themen/Gesellschaft-Umwelt/Gesundheit/Krankenhaeuser/Tabellen/gd-krankenhaeuser-jahre.html> (Letzter Zugriff am 14.08.2022)
- Wallerfels M (2016) Stellen die Babyboomer das Pflegesystem auf den Kopf? ÄrzteZeitung. <https://www.aerztezeitung.de/Politik/Stellen-die-Babyboomer-das-Pflegesystem-auf-den-Kopf-310364.html> (Letzter Zugriff am 14.08.2022)
- ZQP Stiftung (2019) Personalmangel in der ambulanten Pflege gefährdet gute Versorgung. <https://www.zqp.de/personalmangel-ambulante-pflege/> (Letzter Zugriff am 14.08.2022)
